# Supplementary material
Source: ML conference proceedings conference paper supplement (https://proceedings.neurips.cc/paper_files/paper/2019/hash/a4613e8d72a61b3b69b32d040f89ad81-Abstract.html)
Supplement: Supplementary file [file a4613e8d72a61b3b69b32d040f89ad81-Supplemental.zip]

## 393 A Appendix

### 394 A.1 Model details and hyperparameters

395 **General hyperparameters** All models were trained in PyTorch [26]. For Fashion-MNIST, SVHN,  
 396 CIFAR-10, and CIFAR-100, batch sizes of 512 parallelized across 2 GPUs were used. For ImageNet  
 397 and Places365, batch sizes of 512 parallelized across 16 GPUs were used and trained using syn-  
 398 chronous distributed training. For models trained with SGD, a learning rate of 0.1 was used with  
 399 momentum of 0.9 and weight decay of 0.0001. For models trained with Adam, a learning rate of  
 400 0.0003 was used with betas of 0.9 and 0.999 and weight decay of 0.0001.

401 **VGG19** VGG19 was implemented as in [30], except all fully-connected layers were removed  
 402 and replaced with an average pool layer, as in [7, 8]. Precisely, filter sizes were as follows: {64,  
 403 64, max-pool, 128, 128, max-pool, 256, 256, 256, 256, max-pool, 512, 512, 512, 512, max-pool,  
 404 512, 512, 512, 512, global-average-pool}. ReLU non-linearities were applied throughout and batch  
 405 normalization was applied after each convolutional layer. For all convolutional layers, kernel sizes  
 406 of 3 with padding of 1 were used, and all convolutional layers were initialized using the Xavier  
 407 normal initialization with biases initialized to 0, and batch normalization weight and bias parameters  
 408 initialized to 1 and 0, respectively. All VGG19 models were trained for 160 epochs. Learning rates  
 409 were annealed by a factor of 10 at 80 and 120 epochs.

410 **ResNet50** ResNet50 was implemented as in [15]. Precisely, blocks were structured as follows  
 411 (stride, filter sizes, output channels): (1x1, 64, 64, 256) x 3, (2x2, 128, 128, 512) x 4, (2x2, 256, 256,  
 412 1024) x 6, (2x2, 512, 512, 2048) x 3, followed by an average pool layer and a linear classification  
 413 layer. All ResNet50 models were trained for 90 epochs. Learning rates were annealed by a factor of  
 414 10 at 50, 65, and 80 epochs.

415 **Pruning parameters** For all models, an iterative pruning rate of 0.2 was used and 30 pruning  
 416 iterations were performed. Following the sixth pruning iteration, model performance was evaluated  
 417 every third pruning iteration. Pruning was performed using magnitude pruning, such that the smallest  
 418 magnitude weights were removed first, as in [12, 19]. For Fashion-MNIST, SVHN, CIFAR-10 and  
 419 CIFAR-100 winning tickets, late resetting of 1 epoch was used. For ImageNet and Places365 winning  
 420 tickets, late resetting of 3 epochs was used.

### 421 A.2 Randomized masks

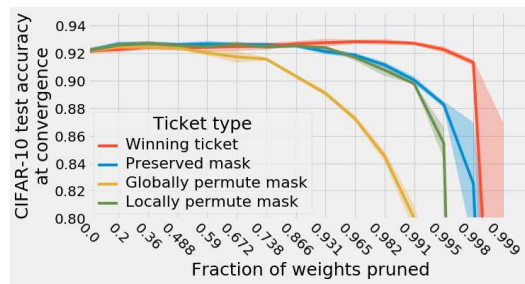

**Figure A1: Comparison of different random masks.** Performance of various random masks on CIFAR-10. Error bars represent mean  $\pm$  standard deviation across six random seeds.

422 When models are pruned in an unstructured manner, there are two aspects of the final pruned model  
 423 that may be informative: the values of the weights themselves and the structure of the mask used  
 424 for pruning. In the original lottery ticket study [7], bad tickets were compared with randomly  
 425 drawn values, but the preserved winning ticket mask. This has the unintended consequence of  
 426 transferring information from the winning ticket to the bad ticket, potentially inflating bad ticket  
 427 performance. This issue seems particularly relevant given that we observed that global pruning  
 428 results in substantially better performance and noticeably different layerwise pruning ratios relative to  
 429 layerwise pruning (Figure 1), suggesting that the mask statistics likely contain important information.

430 To test this, we evaluated three types of masks: preserved masks, globally permuted masks, and  
431 locally permuted masks. In the preserved mask case, the same mask found by the winning ticket is  
432 used for the random ticket. In the locally permuted case, the mask is permuted within each layer,  
433 such that the exact structure of the mask is broken, but the layerwise statistics remain intact. Finally,  
434 in the globally permuted case, the mask is permuted across all layers, such that no information should  
435 be passed between the winning ticket and the bad ticket.

436 Consistent with the lottery ticket hypothesis, we found that the winning ticket outperformed all  
437 random tickets (Figure A1). Interestingly, we found that while locally permuting masks damaged  
438 performance somewhat (blue vs. green), globally permuting the mask results in dramatically worse  
439 performance (blue/green vs. yellow), suggesting that the layerwise statistics derived from training the  
440 over-parameterized model are very informative. As this information would not be available without  
441 going through the process of generating a winning ticket, we consider the purely random mask to be  
442 the most relevant comparison to training an equivalently parameterized model from scratch.
